# Supplementary material for: Use of Cracker Residue in the Diet of Dairy Heifers: Impacts on Animal Health, Ruminal Fatty Acids Profile, Digestibility, Weight Gain, and Economic Viability
Source: MDPI journal article supplement (doi:10.3390/ani14091325), 2024-04-29
Supplement: s1 [file s1]

**Supplementary material Table S1:** Composition of the ingredients used in the concentrate formulation.

| <b>Centesimal Composition</b> | <b>Corn</b> | <b>Cracker Residue</b> | <b>Soybean Bran</b> | <b>Wheat Bran</b> | <b>Soybean Hull</b> | <b>Soybean Oil</b> |
|-------------------------------|-------------|------------------------|---------------------|-------------------|---------------------|--------------------|
| DM %                          | 89.6        | 97.9                   | 90.2                | 89.8              | 91.2                | 99.6               |
| Ash%                          | 1.18        | 1.23                   | 6.62                | 4.35              | 4.49                | -                  |
| CP %                          | 7.6         | 7.7                    | 41.7                | 14.53             | 8.15                | -                  |
| EE                            | 3.62        | 11.09                  | 1.66                | 3.46              | 2.86                | 99.6               |

DM (Dry Matter), Ash (Mineral Matter), CP (Crude Protein), EE (Ether Extract).

**Supplementary material Table S2:** Standardization of the analysis of volatile fatty acids in ruminal fluid

|                                       | Acetic acid          | Propionic acid       | Butiric acid         | Isovaleric acid      | Valeric acid         |
|---------------------------------------|----------------------|----------------------|----------------------|----------------------|----------------------|
| R <sup>2</sup>                        | 0.9975               | 0.9973               | 0.9975               | 0.9971               | 0.9975               |
| Equation                              | y = 0.0099x + 0.0057 | y = 0.0176x + 0.0207 | y = 0.0241x + 0.0033 | y = 0.0306x + 0.0055 | y = 0.0283x + 0.0105 |
| Linear range (mmol L <sup>-1</sup> )* | 1.06 - 168.85        | 1.72 - 137.27        | 1.32 - 105.84        | 0.55 - 43.81         | 0.55 - 43.62         |
| LOD (mmol L <sup>-1</sup> )           | 1.06                 | 0.86                 | 0.66                 | 0.27                 | 0.27                 |
| LOQ (mmol L <sup>-1</sup> )           | 2.12                 | 1.72                 | 1.32                 | 0.55                 | 0.55                 |
| Accuracy (%)                          | 98.30                | 94.89                | 95.82                | 98.29                | 104.26               |
| Repeatability (RSD)                   | 1.67                 | 1.41                 | 1.59                 | 2.45                 | 5.76                 |

Note: \* The linear range, LOD—limit of detection, and LOQ—limit of quantitation were expressed in mmol of VFA for L of ruminal fluid

**Supplementary material Table S3:** EXPERIMENT I: Blood count of heifers fed or not with cracker residue.

| <b>Variables</b>                   | <b>GROUPS<sup>1</sup></b> |                  | <b>SEM<sup>2</sup></b> | <b>P-value</b> |                    |
|------------------------------------|---------------------------|------------------|------------------------|----------------|--------------------|
|                                    | <b>CONTROL</b>            | <b>TREATMENT</b> |                        | <b>Treat</b>   | <b>Treat × day</b> |
| Erythrocytes (x10 <sup>6</sup> µL) | 7.73                      | 7.88             | 0.26                   | 0.85           | 0.20               |
| Hematocrit (%)                     |                           |                  |                        | 0.87           | 0.22               |

|                                   |                   |                   |      |      |             |
|-----------------------------------|-------------------|-------------------|------|------|-------------|
|                                   | 39.0              | 38.9              | 0.80 |      |             |
| Hemoglobin (g/dL)                 |                   |                   |      | 0.90 | 0.52        |
|                                   | 10.3              | 10.1              | 0.21 |      |             |
| Leukocytes (x10 <sup>3</sup> µL)  |                   |                   |      | 0.43 | <b>0.10</b> |
| d 1                               | 11.0              | 13.7              | 0.90 |      |             |
| d 15                              | 23.4              | 21.6              | 0.88 |      |             |
| d 30                              | 24.3              | 24.4              | 0.92 |      |             |
| d 60                              | 21.0 <sup>a</sup> | 17.8 <sup>b</sup> | 0.93 |      |             |
| Neutrophils (x10 <sup>3</sup> µL) |                   |                   |      | 0.56 | 0.12        |
|                                   | 5.18              | 4.89              | 0.40 |      |             |
| Lymphocytes (x10 <sup>3</sup> µL) |                   |                   |      | 0.28 | 0.16        |
|                                   | 16.2              | 15.3              | 0.53 |      |             |
| Monocytes (x10 <sup>3</sup> µL)   |                   |                   |      | 0.36 | 0.19        |
|                                   | 1.44              | 1.22              | 0.13 |      |             |
| Eosinophils (x10 <sup>3</sup> µL) |                   |                   |      | 0.76 | 0.47        |
|                                   | 0.07              | 0.05              | 0.08 |      |             |

<sup>1</sup>Treatments were: Heifers that received a diet with cracker residue (treatment); animals that did not receive cracker residue in the diet (control). <sup>2</sup> SEM - Standard error mean

<sup>a-c</sup> Within a row, averages without a common superscript differ ( $P \leq 0.05$ ) or tend to differ ( $P \leq 0.10$ ).

**Supplementary material Table S4:** EXPERIMENT II: Blood count of heifers fed or not with cracker residue.

| Variables                          | GROUPS <sup>1</sup> |           | SEM <sup>2</sup> | P-value |             |
|------------------------------------|---------------------|-----------|------------------|---------|-------------|
|                                    | CONTROL             | TREATMENT |                  | Treat   | Treat × day |
| Erythrocytes (x10 <sup>6</sup> µL) |                     |           |                  | 0.84    | 0.79        |
|                                    | 7.66                | 7.83      | 0.15             |         |             |
| Hematocrit (%)                     |                     |           |                  | 0.60    | 0.18        |
|                                    | 32.1                | 34.2      | 0.58             |         |             |
| Hemoglobin (g/dL)                  |                     |           |                  | 0.68    | 0.54        |

|                                   |      |      |      |      |      |
|-----------------------------------|------|------|------|------|------|
|                                   | 10.6 | 11.2 | 0.22 |      |      |
| Leukocytes (x10 <sup>3</sup> µL)  |      |      |      | 0.82 | 0.89 |
|                                   | 9.05 | 9.14 | 0.52 |      |      |
| Neutrophils (x10 <sup>3</sup> µL) |      |      |      | 0.30 | 0.21 |
|                                   | 2.78 | 2.16 | 0.43 |      |      |
| Lymphocytes (x10 <sup>3</sup> µL) |      |      |      | 0.51 | 0.67 |
|                                   | 5.61 | 6.10 | 0.48 |      |      |
| Monocytes (x10 <sup>3</sup> µL)   |      |      |      | 0.35 | 0.31 |
|                                   | 0.42 | 0.62 | 0.10 |      |      |
| Eosinophils (x10 <sup>3</sup> µL) |      |      |      | 0.80 | 0.92 |
|                                   | 0.12 | 0.11 | 0.04 |      |      |

<sup>1</sup> Treatments were: Heifers that received a diet with cracker residue (treatment); animals that did not receive cracker residue in the diet (control). <sup>2</sup> SEM - Standard error mean

<sup>a-c</sup> Within a row, averages without a common superscript differ ( $P \leq 0.05$ ) or tend to differ ( $P \leq 0.10$ ).
